# Supplementary material for: Gene regulatory interactions at lateral organ boundaries in maize
Source: Oxford University Press journal article supplement (doi:10.1242/dev.111955), 2014-10-31
Supplement: dev111955supp.pdf [file dev111955supp.pdf]

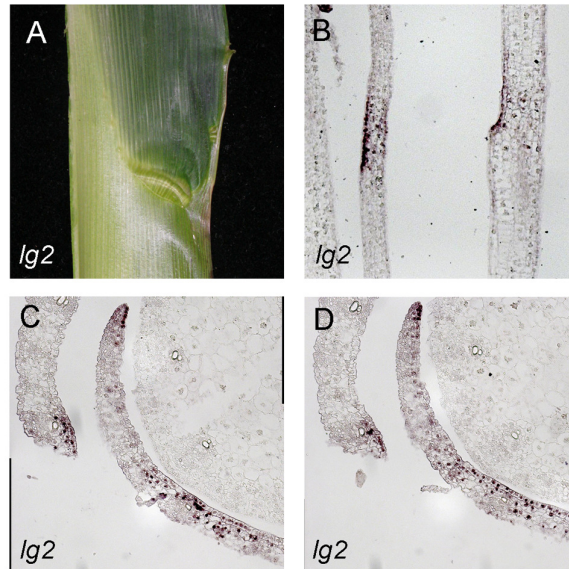

**Figure S1. Phenotype and LG1 accumulation in *lg2-R* leaves.**

A) Leaves of *lg2-R* plants develop ligule and auricle only at the margin (right).  
B) Accumulation of LG1 is only detected in the narrow marginal domains of *lg2* leaves. C, D) In transverse sections, LG1 accumulation typically appears in one side of a leaf at a time. This accumulation pattern reflects the phenotype of *lg2* mutant plants in which the marginal ligule has displaced symmetry across the midrib, with ligule higher on one side than the other.

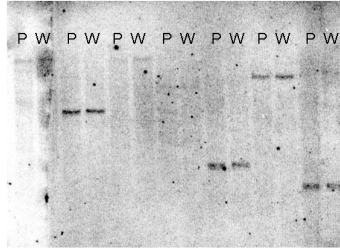

**Figure S2. Southern blot analysis of *wab1* mapping interval.**

DNA from *Wab1-R* homozygotes and their progenitor, PF4902, was digested with 7 enzymes (from left to right: *Bste II*, *EcoRI*, *EcoRV*, *HindIII*, *NcoI*, *SstI* and *Xba*) electrophoresed, blotted and hybridized with a 5' fragment of *wab1*. No differences were detected.

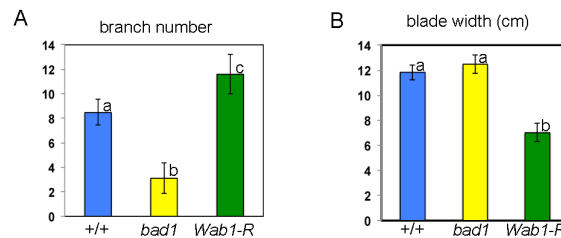

**Figure S3. Quantification of tassel branch number and blade width.**

Maize plants from family 1013, segregating *A619/wab1-bad1* (+), *wab1-bad1/wab1-bad1* (*bad*), *Wab1-R/A619* or *Wab1-R/wab1-bad1* (*Wab1-R*), were scored for tassel branch number and mid-blade width. Tassel branch number is significantly different between each genotype (A) while significant differences in leaf width at mid-blade can be seen when comparing *A619/wab1-bad1* or *wab1-bad1* to *Wab1-R/wab1-bad1* (B). Standard deviation is shown. Significance is indicated by letter (A, B or C): each letter is significantly different from another letter (i.e. B is similar to B but significantly different from A or C at  $p < 0.001$ ).

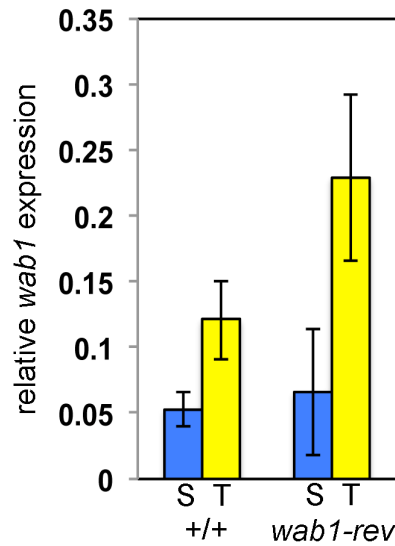

**Figure S4. *wab1* expression in *wab1-rev* shoots and tassels.**

Quantitative real time PCR analysis of *wab1* in *wab1-rev* seedlings (S) or tassels (T) compared to normal siblings shows that ectopic expression caused by the *Wab1-R* mutation remains in the tassel but not seedlings. This suggests that in the leaf, an active DNA binding domain is required to keep *wab1* levels high. Standard deviations are shown in graphs.

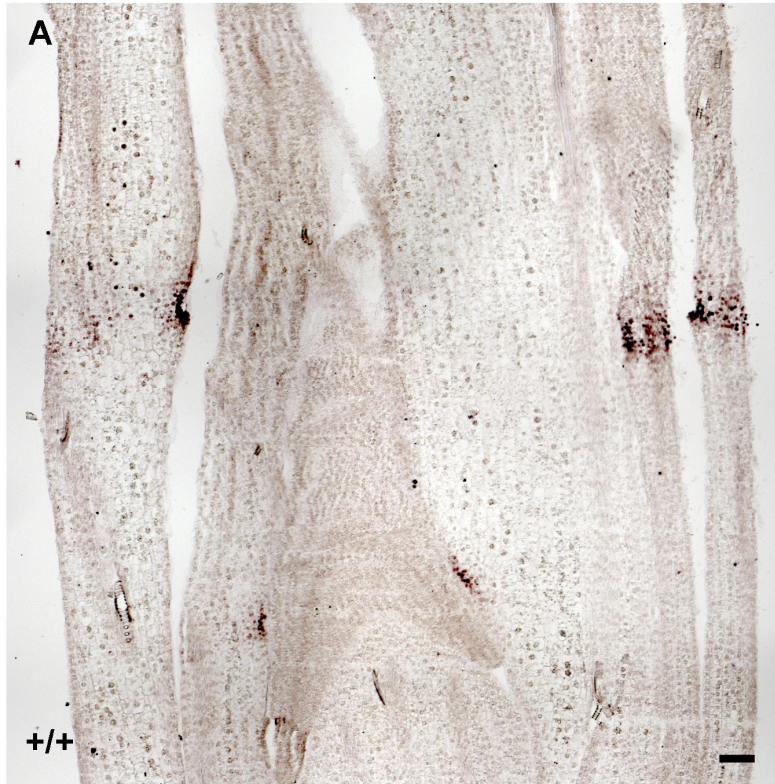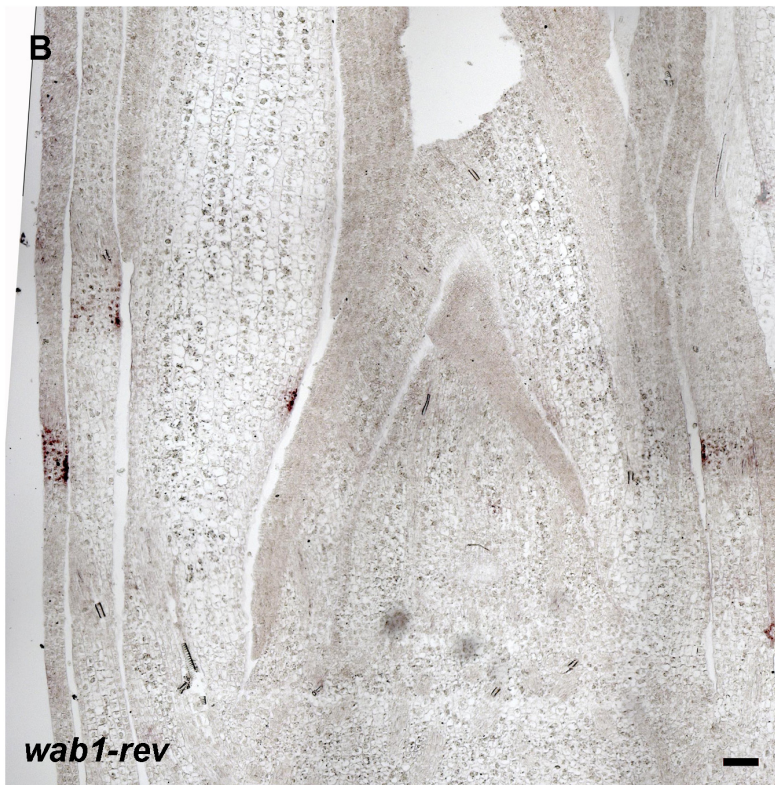

**Figure S5. LG1 accumulates in *wab1-rev* leaves.**

Wild-type (A, +/+) and *wab1-rev* (B) leaves both accumulate LG1 at the blade sheath boundary. Longitudinal sections off-centered from the SAM reveal the earliest signs of LG1 accumulation. Figure 5 J,K are a zoom in taken from these images.

**Table S1. Oligonucleotides used in this study.**

| Primer | Sequence                    |
|--------|-----------------------------|
| P1     | GTGTGGGAGTTCTTGGGAGA        |
| P2     | TGCACGACCCAGTGTATTGT        |
| P3     | CACCATGTTGCCGTACCCTAACAACCC |
| P4     | CCAACTTCTCGGCAACTCCTC       |
| P5     | ACATAAAACGCTCCCCACTG        |
| P6     | TGGCAGTACGACGACACCTA        |
| P7     | GGGGAGGCAAAGTAGATCC         |
| P8     | GCTCGATAAAAAGGCACCAC        |
| P9     | CTCTCACATCTTTCTGCTTCCTG     |
| P10    | CGGCAGGCAGACTACCGTT         |
| P11    | GAGCGACGACGCAGCTTT          |
| P12    | AGTAACGTCAAAGCACAAGATCAG    |
| P13    | TCCAGGAAATCACCGTCTTC        |
| P14    | AGCGACGACGCAGCTTTCTCA       |
| P15    | GCTAAAGACAAAGCAGAGAG        |
| P16    | CTAGTGATCGAAGTCGAGATC       |
| P17    | CCTGCTTCTCATGGATGGTT        |
| P18    | TGGTAGCAGGAAGGGAAACA        |
| P19    | CACCATGATGAACCTATCGGCTGCCG  |
| P20    | CTAGTGATCGAAGTCGAGATCAAAC   |
